# Supplementary material for: A block copolymer containing PEG and histamine-like segments: well-defined functions for gene delivery
Source: Royal Society of Chemistry journal article supplement (doi:10.1039/c5nj03641k), 2016-01-01
Supplement: c5nj03641k1.pdf [file c5nj03641k1.pdf]

## Supporting Information for:

### Block Copolymer Containing PEG and Histamine-like Segments: Well-Defined Function for Gene Delivery

Junbo Li<sup>1\*</sup>, Jianlong Zhao<sup>2</sup>, Jiayu Gao<sup>1</sup>, Ju Liang<sup>1</sup>, Wenlan Wu<sup>2</sup>, Lijuan Liang<sup>1</sup>

#### ***S1 Materials***

Polyethylene glycol monomethyl ether (CH<sub>3</sub>O-PEG<sub>114</sub>-OH) (M<sub>w</sub>=5000 and the polydispersity index PDI=1.05) was purchased from Fluka and used as received. 3-Bromo-1-propanol (95%), N-(3-Aminopropyl)-imidazole (98%), methacryloyl chloride(97%), triethylamine(99.5%), were purchased from Chemical reagent company of Shanghai, China. The used chain transfer agent, 2-cyanopropyl dithiobenzoate(CTA-1) and (4-cyanopentanoic acid)-4-dithiobenzoate (CTA-2), were prepared according to the literature procedure<sup>[1,2]</sup>.

#### ***S2 Synthesis of: 1-(3-aminopropyl)-3-(2-methacryloyloxy propylimidazolium bromine) (AMPImB).***

3-bromo-1-propanol (10g, 0.072 mol) and triethylamine(8.7 g, 0.086 mol) was firstly solved in 80mL dry THF and added into a three-neck 500 mL flask in an ice bath. Under nitrogen, a

---

Corresponding authors at: College of Chemical Engineering & Pharmaceutics, Henan University of Science & Technology, Luo Yang, China, 471023.

*E-mail addresses:* [Lijunbo@haust.edu.cn](mailto:Lijunbo@haust.edu.cn) (J.B. Li);

Tel: +86-379-64231914; Fax: +86-379-64232193.

mixture of methacryloyl chloride( 7.8g, 0.086mol) and 80 mL THF was slowly added to the flask. The reaction mixture was stirred at room temperature for 48 h and then filtered. The filtrate was washed with 300 mL DI water four times and dried with anhydrous magnesium sulfate. Finally, 3-bromopropyl methacrylate (70% yield) was obtained by removed organic solvent.

A typical quaternization reaction was used for preparation of monomer. Under the protection of nitrogen, the mixture of 3-bromopropyl methacrylate (4.4 g, 0.023 mol), N-(3-Aminopropyl)-imidazole (2.9 g, 0.023 mol) and a small amount of hydroquinone (inhibitor) to a 50 mL flask. The mixture was stirred in an oil bath at 45 °C for 72 h and yielded a yellow viscous liquid. The resulting AMPImB monomer was obtained by directly precipitated in 200 mL diethyl ether. <sup>1</sup>HNMR(DMSO), δ/ppm: 9.29(s, 1H), 7.75-7.84(d, 2H), 5.98(s, 1H), 5.88(s, 1H), 4.31(t, 4H), 4.12(t, 2H), 2.65 (m, 2H), 2.21(s, 4H)

### ***S3 Synthesis of PEG-CTA.***

CH<sub>3</sub>O-PEG<sub>114</sub>-OH (10.0 g) was dissolved in 150 mL of toluene and added in a three-necks round-bottom flask equipped with a magnetic stirring bar. After azeotropic distillation of 20 mL of toluene at reduced pressure to remove traces of water, 0.5650 g of CPAD and 0.0623 g of 4-dimethylaminopridine (DMAP) were added. When the solution was homogenized by stirring, 1.1598 g of 1, 3-dicyclohexylcarbodiimide (DCC) was added in portions. The reaction mixture was stirred at room temperature for 3 days. The precipitated urea was filtered. PEO-based macro-RAFT agent with pink color was obtained by precipitation of the filtrate into excess of diethyl ether three times, and then dried under vacuum at room temperature for 2 days.

## **REFERENCES**

- [1] B.B. Bush, C.L. Staiger, J.M. Stoddard, K.J. Shea.. *Macromolecules*, 2002, **35**, 8330.
- [2] S.H. Thang, Y.K. Chong, R.T.A. Mayadunne, G. Moad, E. Rizzardo. *Tetrahedron Lett.*, 1999, **40**, 2435.
